# Supplementary material
Source: MDPI journal article supplement (https://www.mdpi.com/2073-4352/8/4/173)

# checkCIF/PLATON report

You have not supplied any structure factors. As a result the full set of tests cannot be run.

THIS REPORT IS FOR GUIDANCE ONLY. IF USED AS PART OF A REVIEW PROCEDURE FOR PUBLICATION, IT SHOULD NOT REPLACE THE EXPERTISE OF AN EXPERIENCED CRYSTALLOGRAPHIC REFEREE.

No syntax errors found.      CIF dictionary      Interpreting this report

## Datablock: d492

---

Bond precision:    C-C = 0.0065 A

Wavelength=0.71073

Cell:                a=11.3008(8)                b=11.3069(10)                c=12.1027(10)  
                      alpha=102.513(7)        beta=100.115(7)        gamma=94.689(7)  
Temperature:        293 K

|                        | Calculated                                  | Reported                                   |
|------------------------|---------------------------------------------|--------------------------------------------|
| Volume                 | 1474.7(2)                                   | 1474.7(2)                                  |
| Space group            | P -1                                        | P -1                                       |
| Hall group             | -P 1                                        | -P 1                                       |
| Moiety formula         | C44 H48 Cl4 N6 Ni3 O14,<br>1.706(C3 H7 N O) | C44 H48 Cl4 N6 Ni3 O14,<br>1.71(C3 H7 N O) |
| Sum formula            | C49.12 H59.94 Cl4 N7.71<br>Ni3 O15.71       | C49.12 H59.94 Cl4 N7.71<br>Ni3 O15.71      |
| Mr                     | 1327.46                                     | 1327.65                                    |
| Dx, g cm <sup>-3</sup> | 1.495                                       | 1.495                                      |
| Z                      | 1                                           | 1                                          |
| Mu (mm <sup>-1</sup> ) | 1.199                                       | 1.199                                      |
| F000                   | 686.2                                       | 686.0                                      |
| F000'                  | 688.11                                      |                                            |
| h,k,lmax               | 13,13,14                                    | 13,13,14                                   |
| Nref                   | 5799                                        | 5788                                       |
| Tmin,Tmax              | 0.739,0.816                                 | 0.772,1.000                                |
| Tmin'                  | 0.725                                       |                                            |

Correction method= # Reported T Limits: Tmin=0.772 Tmax=1.000  
AbsCorr = MULTI-SCAN

Data completeness= 0.998

Theta(max)= 26.020

R(reflections)= 0.0524( 4073)

wR2(reflections)= 0.1422( 5788)

S = 1.053

Npar= 373

---

The following ALERTS were generated. Each ALERT has the format

**test-name\_ALERT\_alert-type\_alert-level.**

Click on the hyperlinks for more details of the test.

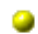

### Alert level C

|                   |                                                  |              |
|-------------------|--------------------------------------------------|--------------|
| PLAT077_ALERT_4_C | Unitcell Contains Non-integer Number of Atoms .. | Please Check |
| PLAT193_ALERT_1_C | Cell and Diffraction Temperatures Differ by .... | 1 Degree     |
| PLAT220_ALERT_2_C | Non-Solvent Resd 1 C Ueq(max)/Ueq(min) Range     | 3.1 Ratio    |
| PLAT242_ALERT_2_C | Low 'MainMol' Ueq as Compared to Neighbors of    | N3 Check     |
| PLAT242_ALERT_2_C | Low 'MainMol' Ueq as Compared to Neighbors of    | C18 Check    |
| PLAT341_ALERT_3_C | Low Bond Precision on C-C Bonds .....            | 0.00653 Ang. |
| PLAT413_ALERT_2_C | Short Inter XH3 .. XHn H22C ..H25C               | 2.08 Ang.    |

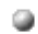

### Alert level G

FORMU01\_ALERT\_1\_G There is a discrepancy between the atom counts in the  
\_chemical\_formula\_sum and \_chemical\_formula\_moiety. This is  
usually due to the moiety formula being in the wrong format.  
Atom count from \_chemical\_formula\_sum: C49.12 H59.94 Cl4 N7.71 Ni3  
Atom count from \_chemical\_formula\_moiety:C49.13 H59.97 Cl4 N7.71 Ni3

|                   |                                                  |              |
|-------------------|--------------------------------------------------|--------------|
| PLAT002_ALERT_2_G | Number of Distance or Angle Restraints on AtSite | 3 Note       |
| PLAT003_ALERT_2_G | Number of Uiso or Uij Restrained non-H Atoms ... | 6 Report     |
| PLAT042_ALERT_1_G | Calc. and Reported MoietyFormula Strings Differ  | Please Check |
| PLAT068_ALERT_1_G | Reported F000 Differs from Calcd (or Missing)... | Please Check |
| PLAT154_ALERT_1_G | The s.u.'s on the Cell Angles are Equal ..(Note) | 0.007 Degree |
| PLAT172_ALERT_4_G | The CIF-Embedded .res File Contains DFIX Records | 2 Report     |
| PLAT177_ALERT_4_G | The CIF-Embedded .res File Contains DELU Records | 1 Report     |
| PLAT178_ALERT_4_G | The CIF-Embedded .res File Contains SIMU Records | 1 Report     |
| PLAT186_ALERT_4_G | The CIF-Embedded .res File Contains ISOR Records | 1 Report     |
| PLAT200_ALERT_1_G | Reported _diffrn_ambient_temperature ..... (K)   | 293 Check    |
| PLAT302_ALERT_4_G | Anion/Solvent/Minor-Residue Disorder (Resd 2 )   | 100% Note    |
| PLAT304_ALERT_4_G | Non-Integer Number of Atoms in ..... Resd 2      | 10.24 Check  |
| PLAT395_ALERT_2_G | Deviating X-O-Y Angle From 120 for O2            | 112.2 Degree |
| PLAT395_ALERT_2_G | Deviating X-O-Y Angle From 120 for O3            | 110.3 Degree |
| PLAT860_ALERT_3_G | Number of Least-Squares Restraints .....         | 36 Note      |

0 **ALERT level A** = Most likely a serious problem - resolve or explain  
0 **ALERT level B** = A potentially serious problem, consider carefully  
7 **ALERT level C** = Check. Ensure it is not caused by an omission or oversight  
16 **ALERT level G** = General information/check it is not something unexpected

6 ALERT type 1 CIF construction/syntax error, inconsistent or missing data  
8 ALERT type 2 Indicator that the structure model may be wrong or deficient  
2 ALERT type 3 Indicator that the structure quality may be low  
7 ALERT type 4 Improvement, methodology, query or suggestion  
0 ALERT type 5 Informative message, check

It is advisable to attempt to resolve as many as possible of the alerts in all categories. Often the minor alerts point to easily fixed oversights, errors and omissions in your CIF or refinement strategy, so attention to these fine details can be worthwhile. In order to resolve some of the more serious problems it may be necessary to carry out additional measurements or structure refinements. However, the purpose of your study may justify the reported deviations and the more serious of these should normally be commented upon in the discussion or experimental section of a paper or in the "special\_details" fields of the CIF. checkCIF was carefully designed to identify outliers and unusual parameters, but every test has its limitations and alerts that are not important in a particular case may appear. Conversely, the absence of alerts does not guarantee there are no aspects of the results needing attention. It is up to the individual to critically assess their own results and, if necessary, seek expert advice.

### **Publication of your CIF in IUCr journals**

A basic structural check has been run on your CIF. These basic checks will be run on all CIFs submitted for publication in IUCr journals (*Acta Crystallographica*, *Journal of Applied Crystallography*, *Journal of Synchrotron Radiation*); however, if you intend to submit to *Acta Crystallographica Section C* or *E* or *IUCrData*, you should make sure that full publication checks are run on the final version of your CIF prior to submission.

### **Publication of your CIF in other journals**

Please refer to the *Notes for Authors* of the relevant journal for any special instructions relating to CIF submission.

---

**PLATON version of 30/01/2018; check.def file version of 30/01/2018**

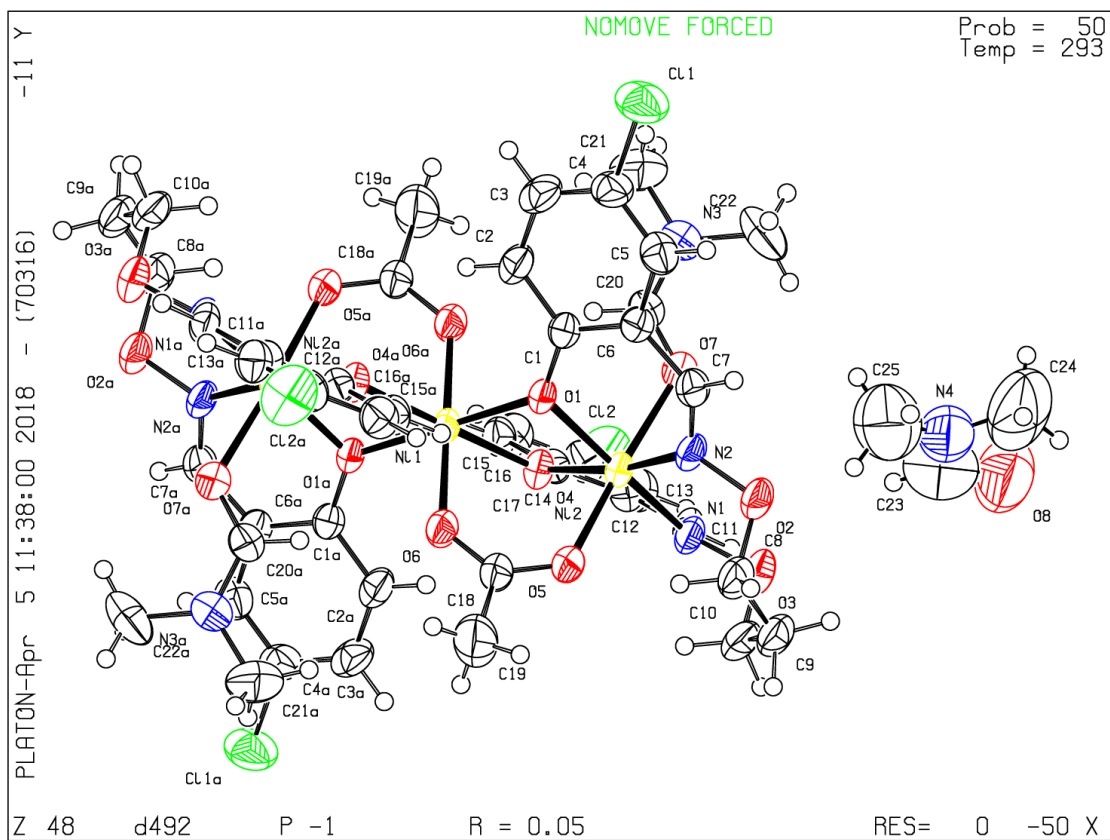

Supplement: s1 [file s1]
