# Supplementary material
Source: MDPI journal article supplement (https://www.mdpi.com/2073-4352/8/4/173)
Supplement: s1 [file s1]

# **Supporting Information**

## **Structures, Fluorescent and magnetic behaviors of Newly Synthesized Ni<sup>II</sup> and Cu<sup>II</sup> Coordination Compounds**

**Lin-Wei Zhang, Xiao-Yan Li, Quan-Peng Kang, Ling-Zhi Liu, Jian-Chun Ma,  
Wen-Kui Dong\***

School of Chemical and Biological Engineering, Lanzhou Jiaotong University, Lanzhou, Gansu, 730070, China

\* Correspondence: dongwk@126.com; Tel.: +86-931-4938-703

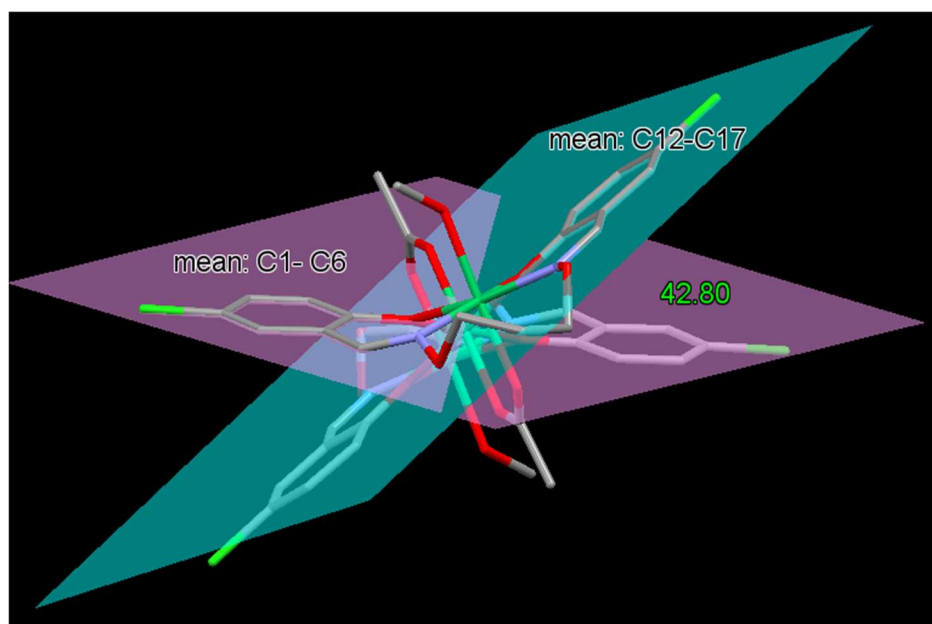

**Figure S1.** View of the dihedral angles between two benzene rings (C1-C6 and C12-C17) of the coordination compound **1**.

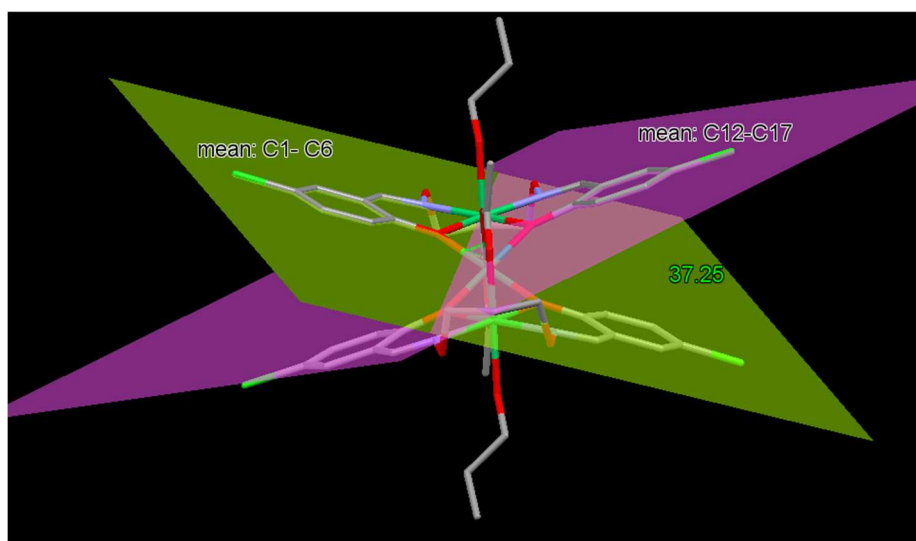

**Figure S2.** View of the dihedral angles between two benzene rings (C1-C6 and C12-C17) of the coordination compound **2**.

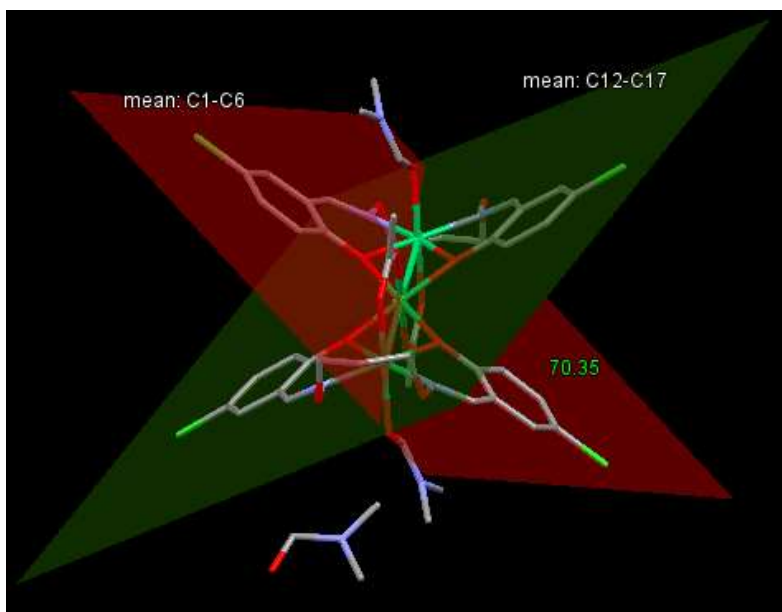

**Figure S3.** View of the dihedral angles between two benzene rings (C1-C6 and C12-C17) of the coordination compound **3**.
